# Supplementary material
Source: PubMed Central journal article supplement (PMC10330112)
Supplement: NIHMS1889755-supplement-Permission_figure_1_and_figure_2.pdf [file NIHMS1889755-supplement-Permission_figure_1_and_figure_2.pdf]

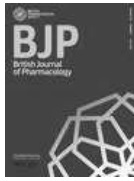

**Targeting vascular (endothelial) dysfunction**

**Author:** Thomas Münzel, Santiago Lamas, Huige Li, et al

**Publication:** British Journal of Pharmacology

**Publisher:** John Wiley and Sons

**Date:** Jul 4, 2016

© 2016 The British Pharmacological Society

**Order Completed**

Thank you for your order.

This Agreement between Andreas Daiber ("You") and John Wiley and Sons ("John Wiley and Sons") consists of your license details and the terms and conditions provided by John Wiley and Sons and Copyright Clearance Center.

Your confirmation email will contain your order number for future reference.

License Number 5517520426473

[Printable Details](#)

License date Mar 28, 2023

**Licensed Content**

|                              |                                                |
|------------------------------|------------------------------------------------|
| Licensed Content Publisher   | John Wiley and Sons                            |
| Licensed Content Publication | British Journal of Pharmacology                |
| Licensed Content Title       | Targeting vascular (endothelial) dysfunction   |
| Licensed Content Author      | Thomas Münzel, Santiago Lamas, Huige Li, et al |
| Licensed Content Date        | Jul 4, 2016                                    |
| Licensed Content Volume      | 174                                            |
| Licensed Content Issue       | 12                                             |
| Licensed Content Pages       | 29                                             |

**Order Details**

|                                                                                            |                              |
|--------------------------------------------------------------------------------------------|------------------------------|
| Type of use                                                                                | Journal/Magazine             |
| Requestor type                                                                             | Author of this Wiley article |
| Is the reuse sponsored by or associated with a pharmaceutical or medical products company? | no                           |
| Format                                                                                     | Print and electronic         |
| Portion                                                                                    | Figure/table                 |
| Number of figures/tables                                                                   | 1                            |
| Will you be translating?                                                                   | No                           |
| Circulation                                                                                | 10000 - 19999                |

**About Your Work**

|                           |                                                                                              |
|---------------------------|----------------------------------------------------------------------------------------------|
| Title of new article      | Noise and air pollution as risk factors for hypertension: part II – pathophysiologic insight |
| Lead author               | Thomas Münzel, Omar Hahad, Andreas Daiber                                                    |
| Title of targeted journal | Hypertension                                                                                 |
| Publisher                 | Wolters Kluwer Health Medical Research - Lippincott Williams & Wilkins                       |
| Expected publication date | Apr 2023                                                                                     |

**Additional Data**

|          |           |
|----------|-----------|
| Portions | figure 4C |
|----------|-----------|

 Requestor Location

Requestor Location  
Andreas Daiber  
University Medical Center  
2nd Med. Clinic - Mol.  
Cardiology  
Geb. 911, EG - Obere  
Zahlbacher Str. 63  
Mainz, other 55101  
Germany  
Attn: Andreas Daiber

 Tax Details

Publisher Tax ID EU826007151  
Customer VAT ID DE149065652

 Price

Total 0.00 EUR

Would you like to purchase the full text of this article? If so, please continue on to the content ordering system located here: [Purchase PDF](#)  
If you click on the buttons below or close this window, you will not be able to return to the content ordering system.

**Total: 0.00 EUR**

[CLOSE WINDOW](#)

[ORDER MORE](#)

**Acute exposure to nocturnal train noise induces endothelial dysfunction and pro-thromboinflammatory changes of the plasma proteome in healthy subjects**

**SPRINGER NATURE**

**Author:** Johannes Herzog et al

**Publication:** Basic Research in Cardiology

**Publisher:** Springer Nature

**Date:** Oct 29, 2019

*Copyright © 2019, The Author(s)*

**Creative Commons**

This is an open access article distributed under the terms of the Creative Commons CC BY license, which permits unrestricted use, distribution, and reproduction in any medium, provided the original work is properly cited.

You are not required to obtain permission to reuse this article.

To request permission for a type of use not listed, please contact Springer Nature

### Crucial role for Nox2 and sleep deprivation in aircraft noise-induced vascular and cerebral oxidative stress, inflammation, and gene regulation

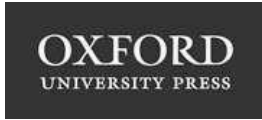

**Author:** Kröller-Schön, Swenja; Daiber, Andreas

**Publication:** European Heart Journal

**Publisher:** Oxford University Press

**Date:** 2018-06-14

*Copyright © 2018, Oxford University Press*

#### Order Completed

Thank you for your order.

This Agreement between Andreas Daiber ("You") and Oxford University Press ("Oxford University Press") consists of your license details and the terms and conditions provided by Oxford University Press and Copyright Clearance Center.

Your confirmation email will contain your order number for future reference.

**License Number** 5517520111665

[Printable Details](#)

**License date** Mar 28, 2023

#### ✔ Licensed Content

|                                     |                                                                                                                                                 |
|-------------------------------------|-------------------------------------------------------------------------------------------------------------------------------------------------|
| <b>Licensed Content Publisher</b>   | Oxford University Press                                                                                                                         |
| <b>Licensed Content Publication</b> | European Heart Journal                                                                                                                          |
| <b>Licensed Content Title</b>       | Crucial role for Nox2 and sleep deprivation in aircraft noise-induced vascular and cerebral oxidative stress, inflammation, and gene regulation |
| <b>Licensed Content Author</b>      | Kröller-Schön, Swenja; Daiber, Andreas                                                                                                          |
| <b>Licensed Content Date</b>        | Jun 14, 2018                                                                                                                                    |
| <b>Licensed Content Volume</b>      | 39                                                                                                                                              |
| <b>Licensed Content Issue</b>       | 38                                                                                                                                              |

#### 📄 Order Details

|                                                               |                            |
|---------------------------------------------------------------|----------------------------|
| <b>Type of Use</b>                                            | Journal                    |
| <b>Requestor type</b>                                         | Author of this OUP content |
| <b>Pharmaceutical support or sponsorship for this project</b> | No                         |
| <b>Format</b>                                                 | Print and electronic       |
| <b>Portion</b>                                                | Figure/table               |
| <b>Number of figures/tables</b>                               | 1                          |
| <b>Will you be translating?</b>                               | No                         |
| <b>Circulation/distribution</b>                               | 10000                      |

#### 📁 About Your Work

|                                  |                                                                                              |
|----------------------------------|----------------------------------------------------------------------------------------------|
| <b>Title of new article</b>      | Noise and air pollution as risk factors for hypertension: part II – pathophysiologic insight |
| <b>Lead author</b>               | Thomas Münzel, Omar Hahad, Andreas Daiber                                                    |
| <b>Title of targeted journal</b> | Hypertension                                                                                 |
| <b>Publisher</b>                 | Wolters Kluwer Health Medical Research - Lippincott Williams & Wilkins                       |
| <b>Expected publication date</b> | Apr 2023                                                                                     |

#### 📁 Additional Data

|                 |                 |
|-----------------|-----------------|
| <b>Portions</b> | figure 6A and B |
|-----------------|-----------------|

|  Requestor Location |  Tax Details                                                                                               |
|-----------------------------------------------------------------------------------------------------|--------------------------------------------------------------------------------------------------------------------------------------------------------------------------------------------|
| <b>Requestor Location</b>                                                                           | Andreas Daiber<br>University Medical Center<br>2nd Med. Clinic - Mol.<br>Cardiology<br>Geb. 911, EG - Obere<br>Zahlbacher Str. 63<br>Mainz, other 55101<br>Germany<br>Attn: Andreas Daiber |
| <b>\$ Price</b>                                                                                     |                                                                                                                                                                                            |
| <b>Total</b>                                                                                        | 0.00 EUR                                                                                                                                                                                   |
| <b>Total: 0.00 EUR</b>                                                                              |                                                                                                                                                                                            |
| <a href="#">CLOSE WINDOW</a>                                                                        | <a href="#">ORDER MORE</a>                                                                                                                                                                 |

### Effect of nighttime aircraft noise exposure on endothelial function and stress hormone release in healthy adults

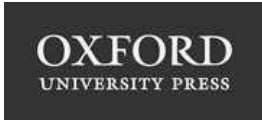

**Author:** Schmidt, Frank P.; Basner, Mathias

**Publication:** European Heart Journal

**Publisher:** Oxford University Press

**Date:** 2013-07-02

*Copyright © 2013, Oxford University Press*

#### Order Completed

Thank you for your order.

This Agreement between Andreas Daiber ("You") and Oxford University Press ("Oxford University Press") consists of your license details and the terms and conditions provided by Oxford University Press and Copyright Clearance Center.

Your confirmation email will contain your order number for future reference.

License Number 5517511264299

[Printable Details](#)

License date Mar 28, 2023

#### ☑ Licensed Content

|                              |                                                                                                                  |
|------------------------------|------------------------------------------------------------------------------------------------------------------|
| Licensed Content Publisher   | Oxford University Press                                                                                          |
| Licensed Content Publication | European Heart Journal                                                                                           |
| Licensed Content Title       | Effect of nighttime aircraft noise exposure on endothelial function and stress hormone release in healthy adults |
| Licensed Content Author      | Schmidt, Frank P.; Basner, Mathias                                                                               |
| Licensed Content Date        | Jul 2, 2013                                                                                                      |
| Licensed Content Volume      | 34                                                                                                               |
| Licensed Content Issue       | 45                                                                                                               |

#### 📄 Order Details

|                                                        |                            |
|--------------------------------------------------------|----------------------------|
| Type of Use                                            | Journal                    |
| Requestor type                                         | Author of this OUP content |
| Pharmaceutical support or sponsorship for this project | No                         |
| Format                                                 | Print and electronic       |
| Portion                                                | Figure/table               |
| Number of figures/tables                               | 1                          |
| Will you be translating?                               | No                         |
| Circulation/distribution                               | 10000                      |

#### 📁 About Your Work

|                           |                                                                                              |
|---------------------------|----------------------------------------------------------------------------------------------|
| Title of new article      | Noise and air pollution as risk factors for hypertension: part II – pathophysiologic insight |
| Lead author               | Thomas Münzel, Omar Hahad, Andreas Daiber                                                    |
| Title of targeted journal | Hypertension                                                                                 |
| Publisher                 | Wolters Kluwer Health Medical Research - Lippincott Williams & Wilkins                       |
| Expected publication date | Apr 2023                                                                                     |

#### 📁 Additional Data

|          |          |
|----------|----------|
| Portions | figure 2 |
|----------|----------|

|  Requestor Location |  Tax Details                                                                                               |
|-----------------------------------------------------------------------------------------------------|--------------------------------------------------------------------------------------------------------------------------------------------------------------------------------------------|
| <b>Requestor Location</b>                                                                           | Andreas Daiber<br>University Medical Center<br>2nd Med. Clinic - Mol.<br>Cardiology<br>Geb. 911, EG - Obere<br>Zahlbacher Str. 63<br>Mainz, other 55101<br>Germany<br>Attn: Andreas Daiber |
| <b>\$ Price</b>                                                                                     |                                                                                                                                                                                            |
| <b>Total</b>                                                                                        | 0.00 EUR                                                                                                                                                                                   |
| <b>Total: 0.00 EUR</b>                                                                              |                                                                                                                                                                                            |
| <a href="#">CLOSE WINDOW</a>                                                                        | <a href="#">ORDER MORE</a>                                                                                                                                                                 |

# WHO Noise Guidelines

## Annual Review of Public Health

Vol. 41:309-328 (Volume publication date April 2020)

First published as a Review in Advance on January 10, 2020

<https://doi.org/10.1146/annurev-publhealth-081519-062400>

**Thomas Münzel,<sup>1,2</sup> Swenja Kröller-Schön,<sup>1</sup> Matthias Oelze,<sup>1</sup> Tommaso Gori,<sup>1,2</sup> Frank P Schmidt,<sup>1</sup> Sebastian Steven,<sup>1</sup> Omar Hahad,<sup>1</sup> Martin Röösli,<sup>3,4</sup> Jean-Marc Wunderli,<sup>5</sup> Andreas Daiber,<sup>1,2</sup> and Mette Sørensen<sup>6,7</sup>**

<sup>1</sup>Center for Cardiology, University Medical Center Mainz, 55131 Mainz, Germany; email: [tmuenzel@uni-mainz.de](mailto:tmuenzel@uni-mainz.de)

<sup>2</sup>German Center for Cardiovascular Research (DZHK), Partner Site Rhine-Main, 55131 Mainz, Germany

<sup>3</sup>Department of Epidemiology and Public Health, Swiss Tropical and Public Health Institute, 4051 Basel, Switzerland

<sup>4</sup>University of Basel, 4001 Basel, Switzerland

<sup>5</sup>Empa, Swiss Federal Laboratories for Materials Science and Technology, 8600 Dübendorf, Switzerland

<sup>6</sup>Diet, Genes and Environment Unit, Danish Cancer Society Research Center, 2100 Copenhagen, Denmark

<sup>7</sup>Department of Natural Science and Environment, Roskilde University, 4000 Roskilde, Denmark

[Full Text HTML](#)

[Download PDF](#)

[Supplemental Material](#)

[Article Metrics](#)

### Reprints Download Citation Citation Alerts

Copyright © 2020 by Annual Reviews. This work is licensed under a Creative Commons Attribution 4.0 International License, which permits unrestricted use, distribution, and reproduction in any medium, provided the original author and source are credited. See credit lines of images or other third party material in this article for license information.

## Sections

ABSTRACT

KEYWORDS

INTRODUCTION

NIGHTTIME TRAFFIC NOISE AND CVD: EPIDEMIOLOGICAL STUDIES

TRANSLATIONAL STUDIES: EFFECTS OF SIMULATED NIGHTTIME NOISE ON VASCULAR FUNCTION

MECHANISTIC INSIGHT FROM ANIMAL STUDIES

NOISE MITIGATION MEASURES

CONCLUSIONS

DISCLOSURE STATEMENT

AUTHOR CONTRIBUTIONS

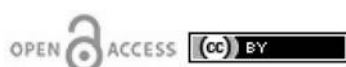

## Abstract



The WHO report focused on whole-day noise exposure, but new epidemiological and translationa field noise studies indicate that nighttime noise, in particular, is an important risk factor for cardiovascular disease (CVD) through increased levels of stress hormones and vascular oxidative stress, leading to endothelial dysfunction and subsequent development of various CVDs. Novel experimental studies found noise to be associated with oxidative stress–induced vascular and brain damage, mediated by activation of the NADPH oxidase, uncoupling of endothelial and neuronal nitric oxide synthase, and vascular/brain infiltration with inflammatory cells. Noise-induced pathophysiology was more pronounced in response to nighttime as compared with daytime noise. This review focuses on the consequences of nighttime noise.

## **Keywords**

---

traffic noise, cardiovascular disease, CVD, sleep disturbance, oxidative stress, circadian clock, mitigation
