# Supplementary material
Source: PubMed Central journal article supplement (PMC10330112)
Supplement: NIHMS1889755-supplement-Supplemental_Publication_Material.pdf [file NIHMS1889755-supplement-Supplemental_Publication_Material.pdf]

**Online Supplement:**  
**Noise and air pollution as risk factors for hypertension: part II –**  
**pathophysiologic insight**

*Short title: Noise/air pollution and hypertension-pathophysiology*

Omar Hahad<sup>1,2,3</sup>, Sanjay Rajagopalan<sup>4\*</sup>, Jos Lelieveld<sup>5</sup>, Mette Sørensen<sup>6,7</sup>, Katie Frenis<sup>8</sup>, Andreas Daiber<sup>1,2</sup>, Mathias Basner<sup>9</sup>, Mark Nieuwenhuijsen<sup>10,11,12,13</sup>, Robert D. Brook<sup>14</sup>, Thomas Münzel<sup>1,2\*</sup>

<sup>1</sup>Department of Cardiology – Cardiology I, University Medical Center of the Johannes Gutenberg University Mainz, Mainz, Germany

<sup>2</sup>German Center for Cardiovascular Research (DZHK), partner site Rhine-Main, Mainz, Germany

<sup>3</sup>Leibniz Institute for Resilience Research (LIR), Mainz, Germany

<sup>4</sup>Harrington Heart and Vascular Institute, University Hospitals and Case Western Reserve University, Cleveland, OH, USA

<sup>5</sup>Atmospheric Chemistry Department, Max Planck Institute for Chemistry, Mainz, Germany

<sup>6</sup>Environment and Cancer, Danish Cancer Society Research Center, Copenhagen, Denmark

<sup>7</sup>Department of Natural Science and Environment, Roskilde University, Roskilde, Denmark

<sup>8</sup>Boston Children's Hospital and Harvard Medical School, Hematology/Oncology, Boston, MA, USA

<sup>9</sup>Department of Psychiatry, Unit for Experimental Psychiatry, Perelman School of Medicine, University of Pennsylvania, Philadelphia, PA, USA

<sup>10</sup>Institute for Global Health (ISGlobal), Barcelona, Spain

<sup>11</sup>Department of Experimental and Health Sciences, Universitat Pompeu Fabra (UPF), Barcelona, Spain

<sup>12</sup>CIBER Epidemiología y Salud Pública (CIBERESP), Madrid, Spain

<sup>13</sup>Center for Urban Research, RMIT University, Melbourne VIC, Australia

<sup>14</sup>Division of Cardiovascular Diseases, Department of Internal Medicine, Wayne State University, Detroit, MI, USA

**\*Address for correspondence:**

Thomas Münzel MD  
Department of Cardiology, Cardiology I  
University Medical Center of the Johannes Gutenberg University Mainz  
Langenbeckstraße 1, 55131 Mainz, Germany  
E-Mail: [tmuenzel@uni-mainz.de](mailto:tmuenzel@uni-mainz.de)  
Phone: +49 (0) 6131 17-7250  
Fax: +49 (0) 6131 17-6615

or

Sanjay Rajagopalan MD  
Director, Cardiovascular Research Institute, School of Medicine  
Professor, Department of Medicine, School of Medicine  
[Sanjay.Rajagopalan@UHhospitals.org](mailto:Sanjay.Rajagopalan@UHhospitals.org)

**Supplemental Table S1: Effect of Air Pollution filtration intervention on Blood Pressure**

| Author(s)                                                    | Experimental Design and Outcomes                                                                                                                         | Population                                       | Intervention    | Details on Intervention                                                                                                                                                                    | Main outcomes                                                                                                                                                                                                                                                        |                                                                                                                                                                                                                                                                                                                                                      |
|--------------------------------------------------------------|----------------------------------------------------------------------------------------------------------------------------------------------------------|--------------------------------------------------|-----------------|--------------------------------------------------------------------------------------------------------------------------------------------------------------------------------------------|----------------------------------------------------------------------------------------------------------------------------------------------------------------------------------------------------------------------------------------------------------------------|------------------------------------------------------------------------------------------------------------------------------------------------------------------------------------------------------------------------------------------------------------------------------------------------------------------------------------------------------|
| <b>Brauner et al.</b><br><br><b>(Copenhagen, Denmark)</b>    | Randomized, crossover study.<br><br>Outcomes: Microvascular flow measured by digital tonometry, SBP, DBP                                                 | 21 nonsmoking couples                            | Home Air Filter | Two 48-hour exposures to particle-filtered or non-filtered air (2,533–4,058 and 7,718–12,988 particles/cm <sup>3</sup> , respectively) at home                                             | Air filtration led to improvement in microvascular flow. No significant difference in SBP or DBP was seen between intervention and non-intervention.                                                                                                                 | <sup>1</sup> Brauner EV, Forchhammer L, Moller P, Barregard L, Gunnarsen L, Afshari A, Wahlin P, Glasius M, Dragsted LO, Basu S, Raaschou-Nielsen O, Loft S. Indoor particles affect vascular function in the aged: An air filtration-based intervention study. <i>American journal of respiratory and critical care medicine</i> . 2008;177:419-425 |
| <b>Allen et al.</b><br><br><b>(British Columbia, Canada)</b> | Randomized crossover study<br><br>Outcome: endothelial function (RHI), IL6, CRP, band cells, malondialdehyde, 8-iso-prostaglandin F2 $\alpha$ , SBP, DBP | 45 adults living in woodsmoke-impacted community | Home Air Filter | 7-day periods of home air filters. Indoor air filters reduced indoor fine particle concentrations by 60% (from 11.2 mg/m <sup>3</sup> with HEPA off to 4.6 mg/m <sup>3</sup> with HEPA on) | Air filtration led to improved endothelial function (9.4% increase in RHI), and a trend towards decrease in CRP levels (-32.6%, P=0.06). No difference in other markers. No significant difference in SBP or DBP was seen between intervention and non-intervention. | <sup>2</sup> Allen RW, Carlsten C, Karlen B, Leckie S, van Eeden S, Vedal S, Wong I, Brauer M. An air filter intervention study of endothelial function among healthy adults in a woodsmoke-impacted community. <i>American journal of respiratory and critical care medicine</i> . 2011;183:1222-1230                                               |
| <b>Weichenthal et al.</b><br><br><b>(Manitoba, Canada)</b>   | Randomized, double-blind, crossover<br><br>Outcome: lung function, BP, and endothelial function                                                          | 37 residents in 20 homes                         | Home Air Filter | Electrostatic air filter or a placebo filter for 7 days in random order. PM <sub>2.5</sub> decreased by 37 ug/m <sup>3</sup>                                                               | Air filtration led to 7.9 mm Hg (95% CI: -17, 0.82) decrease in SBP and a 4.5 mm Hg (95% CI: -11, 2.4) decrease in DBP. Air filtration also led to improvement in FEV <sub>1</sub>                                                                                   | <sup>3</sup> Weichenthal S, Mallach G, Kulka R, Black A, Wheeler A, You H, St-Jean M, Kwiatkowski R, Sharp D. A randomized double-blind crossover study of indoor air filtration and acute changes in cardiorespiratory health in a first nations community. <i>Indoor air</i> . 2013;23:175-184                                                     |
| <b>Chen et al 2015</b><br><br><b>(Shanghai, China)</b>       | Randomized, double-blind crossover<br><br>Outcomes: 14 circulating biomarkers of inflammation, coagulation, and vasoconstriction; lung function; BP; and | 35 healthy young university students             | Home Air Filter | Air filtration or sham filtration for 48 h with a 2-week washout interval. Air filtration reduced indoor PM <sub>2.5</sub> concentration by more than one-                                 | After 48 h of air filtration exposure, SBP(7.9mmHg), DBP (4.5mmHg), MCP-1, IL-1 $\beta$ , MPO, sCD40L were significantly reduced                                                                                                                                     | <sup>4</sup> Chen R, Zhao A, Chen H, Zhao Z, Cai J, Wang C, Yang C, Li H, Xu X, Ha S, Li T, Kan H. Cardiopulmonary benefits of reducing indoor particles of outdoor origin: A randomized, double-blind crossover trial of air purifiers. <i>Journal of the American College of Cardiology</i> . 2015;65:2279-2287                                    |

|                                                    |                                                                                              |                                                        |                 |                                                                                                                                                                                                                                                                                                                 |                                                                                                                                                                                                                                                                                                                                                                                   |                                                                                                                                                                                                                                                                                                                                                                                   |
|----------------------------------------------------|----------------------------------------------------------------------------------------------|--------------------------------------------------------|-----------------|-----------------------------------------------------------------------------------------------------------------------------------------------------------------------------------------------------------------------------------------------------------------------------------------------------------------|-----------------------------------------------------------------------------------------------------------------------------------------------------------------------------------------------------------------------------------------------------------------------------------------------------------------------------------------------------------------------------------|-----------------------------------------------------------------------------------------------------------------------------------------------------------------------------------------------------------------------------------------------------------------------------------------------------------------------------------------------------------------------------------|
|                                                    | fractional exhaled nitric oxide                                                              |                                                        |                 | half, from 96.2 to 41.3 $\mu\text{g}/\text{m}^3$ .                                                                                                                                                                                                                                                              |                                                                                                                                                                                                                                                                                                                                                                                   |                                                                                                                                                                                                                                                                                                                                                                                   |
| <b>Shao et al. 2017</b><br><b>(Beijing, China)</b> | Randomized, double-blind, crossover<br><br>Outcomes: BP, cardio-respiratory biomarker levels | 35 non-smoker senior participants with or without COPD | Home Air Filter | Portable air filtration units randomly allocated to active filtration (filter in) vs sham (filter out) for 2 weeks.                                                                                                                                                                                             | Air filtration reduced IL-8 by 59% but had no impact on BP, lung function tests, IL6, CRP, fibrinogen, Urinary 8-OHdG, or HRV measures                                                                                                                                                                                                                                            | <sup>5</sup> Shao D, Du Y, Liu S, Brunekreef B, Meliefste K, Zhao Q, Chen J, Song X, Wang M, Wang J, Xu H, Wu R, Wang T, Feng B, Lung CS, Wang X, He B, Huang W. Cardiorespiratory responses of air filtration: A randomized crossover intervention trial in seniors living in beijing: Beijing indoor air purifier study, biopsy. <i>Sci Total Environ.</i> 2017;603-604:541-549 |
| <b>Karottki et al. (Copenhagen, Denmark)</b>       | Randomized, double-blind, crossover<br><br>Outcome: microvascular function (PAT), BP         | 48 healthy non-smoking volunteers > 51 years           | Home Air Filter | Periods with or without filter in living room/bedroom for 2 weeks                                                                                                                                                                                                                                               | Air filtration did not lead to change in microvascular; however, microvascular function was associated with $\text{PM}_{2.5}$ decrease in the bedroom. No significant difference in SBP or DBP was seen between intervention and non-intervention.                                                                                                                                | <sup>6</sup> Karottki DG, Spilak M, Frederiksen M, Gunnarsen L, Brauner EV, Kolarik B, Andersen ZJ, Sigsgaard T, Barregard L, Strandberg B, Sallsten G, Moller P, Loft S. An indoor air filtration study in homes of elderly: Cardiovascular and respiratory effects of exposure to particulate matter. <i>Environ Health.</i> 2013;12:116                                        |
| <b>Langrish et al. (Beijing, China)</b>            | Open-label cross-over randomised controlled trial.<br><br>Outcome: BP, HRV                   | 15 healthy volunteers                                  | Personal Mask   | 2-hour city walk with or without an air filter mask<br><br>Mask efficiency of a range of masks tested prior to human intervention study<br><br>Mask penetrance was highly dependent on mask type. $\text{PM}_{2.5}$ levels lower with mask (86 vs. 140 $\text{mg}/\text{m}^3$ ). No change in particle numbers. | Air filter mask led to reduction in SBP ( $114 \pm 10$ vs $121 \pm 11$ mmHg, $P < 0.01$ ) compared with control, but no difference in heart rate.<br><br>Over the 24-hour period heart rate variability increased (SDNN $65.6 \pm 11.5$ vs $61.2 \pm 11.4$ ms, $P < 0.05$ ; LF-power $919 \pm 352$ vs $816 \pm 340$ $\text{ms}^2$ , $P < 0.05$ ) when subjects wore the facemask. | <sup>7</sup> Langrish JP, Mills NL, Chan JK, Leseman DL, Aitken RJ, Fokkens PH, Cassee FR, Li J, Donaldson K, Newby DE, Jiang L. Beneficial cardiovascular effects of reducing exposure to particulate air pollution with a simple facemask. <i>Particle and fibre toxicology.</i> 2009;6:8                                                                                       |
| <b>Langrish et al.</b>                             | Open randomized crossover trial                                                              | 98 patients with                                       | Personal Mask   | Walking on a predefined route in                                                                                                                                                                                                                                                                                | Mask reduced maximal ST segment                                                                                                                                                                                                                                                                                                                                                   | <sup>8</sup> Langrish JP, Li X, Wang S, Lee MM, Barnes GD, Miller MR, Cassee FR, Boon NA, Donaldson                                                                                                                                                                                                                                                                               |

|                                     |                                                                                                                |                         |                      |                                                                                                                                                                                                                                                                  |                                                                                                                                                                                                                                                                                                                                                                                                    |                                                                                                                                                                                                                                               |
|-------------------------------------|----------------------------------------------------------------------------------------------------------------|-------------------------|----------------------|------------------------------------------------------------------------------------------------------------------------------------------------------------------------------------------------------------------------------------------------------------------|----------------------------------------------------------------------------------------------------------------------------------------------------------------------------------------------------------------------------------------------------------------------------------------------------------------------------------------------------------------------------------------------------|-----------------------------------------------------------------------------------------------------------------------------------------------------------------------------------------------------------------------------------------------|
| <b>(Beijing, China)</b>             | Outcomes: blood pressure, heart rate, and 12-lead electrocardiography over 24 hours                            | coronary heart disease  |                      | Beijing with or without a face mask (Dust Respirator) in. Estimated exposure with mask (assuming 97% efficiency) reduced from 89 µg/m <sup>3</sup> and 43,900 particles/cm <sup>3</sup> to 2 µg/m <sup>3</sup> and 1,200 particles/cm <sup>3</sup> respectively. | depression, mean BP (93±10 vs. 96±10 mmHg, p = 0.03) and increased heart rate variability.                                                                                                                                                                                                                                                                                                         | K, Li J, Li L, Mills NL, Newby DE, Jiang L. Reducing personal exposure to particulate air pollution improves cardiovascular health in patients with coronary heart disease. Environ Health Perspect. 2012;120:367-372                         |
| <b>Chuang 2017 (Taipei, Taiwan)</b> | Randomized, crossover study<br><br>Outcomes: BP and blood biomarkers                                           | 200 homemakers          | Home Air Filter      | Air conditioners were fashioned with a widely available filter or with a false air conditioner filter and run continuously for 1 year. After 1 year the type of filter was switched and air conditioners were run for another year.                              | False air conditioner filter use resulted in increased levels of PM2.5 and total VOCs; these elevated levels were associated with increased high-sensitivity-C reactive protein, 8-hydroxy-2'-deoxyguanosine, and blood pressure.<br><br>False air conditioner filter use resulted in a greater percent change in blood pressure, than real air filtration (SBP: 3.01 vs 0.12; DBP: 2.14 vs -1.21) | <sup>9</sup> Chuang HC, Ho KF, Lin LY, Chang TY, Hong GB, Ma CM, Liu IJ, Chuang KJ. Long-term indoor air conditioner filtration and cardiovascular health: A randomized crossover intervention study. Environ Int. 2017;106:91-96             |
| <b>Shi 2017 (Shanghai, China)</b>   | Randomized, crossover trial<br><br>Outcomes: Heart rate variability, ambulatory BP, and circulating biomarkers | 24 healthy young adults | Personal Respirators | Participants were randomized to wear or not wear a particulate-filtering respirator for 48 hours, and alternate after a 3-week washout interval. Mean daily average PM2.5                                                                                        | Wearing respirators was associated with a 2.7mmHg decrease in SBP. With respect to heart rate variability, there was a 12.5% increase in high frequency power, 10.9% increase in the root mean square of                                                                                                                                                                                           | <sup>10</sup> Shi J, Lin Z, Chen R, Wang C, Yang C, Cai J, Lin J, Xu X, Ross JA, Zhao Z, Kan H. Cardiovascular benefits of wearing particulate-filtering respirators: A randomized crossover trial. Environ Health Perspect. 2017;125:175-180 |

|                                       |                                                                                                                                                               |                            |                         |                                                                                                                                                                                                             |                                                                                                                                                                                                                                                           |                                                                                                                                                                                                                                                                                                                      |
|---------------------------------------|---------------------------------------------------------------------------------------------------------------------------------------------------------------|----------------------------|-------------------------|-------------------------------------------------------------------------------------------------------------------------------------------------------------------------------------------------------------|-----------------------------------------------------------------------------------------------------------------------------------------------------------------------------------------------------------------------------------------------------------|----------------------------------------------------------------------------------------------------------------------------------------------------------------------------------------------------------------------------------------------------------------------------------------------------------------------|
|                                       |                                                                                                                                                               |                            |                         | concentration during intervention was 74.2 $\mu\text{g}/\text{m}^3$                                                                                                                                         | the successive differences, and 22.1% increase in the percentage of normal RR intervals with duration >50 msec different from the previous normal RR interval (pNN50). There was also a 7.8% decrease in the ratio of low frequency/high frequency power. |                                                                                                                                                                                                                                                                                                                      |
| <b>Morishita 2018 (Michigan, USA)</b> | Randomized, double-blind, 3-way crossover study<br><br>Outcomes: Brachial BP, noninvasive aortic hemodynamics, pulse-wave velocity and heart rate variability | 40 nonsmoking older adults | Portable Air Filtration | High-efficiency air purifiers, low-efficiency air purifiers and sham filters were placed in the bedroom and main living space for 3 days follow by a 1-week washout periods between switching filter types. | High-efficiency and low-efficiency filtration lead too decreased brachial systolic and diastolic BP by 3.2mmHg and 1.5mmHg respectively. Other outcomes were not significantly affected.                                                                  | <sup>11</sup> Morishita M, Adar SD, D'Souza J, Ziemba RA, Bard RL, Spino C, Brook RD. Effect of portable air filtration systems on personal exposure to fine particulate matter and blood pressure among residents in a low-income senior facility: A randomized clinical trial. JAMA Intern Med. 2018;178:1350-1357 |
| <b>Morishita 2019 (Michigan, USA)</b> | Randomized, single-blind, crossover study<br><br>Outcomes: Brachial BP, aortic hemodynamics, heart rate variability, and reactive hyperemia index             | 50 healthy adults          | Personal N95 Respirator | Multiple 2-hour near-roadway exposures with either not wearing, or wearing an N95 respirator for 1 week. Cross-over to alternate intervention occurred week 2.                                              | Not wearing an N95 respirator resulted in acutely worsened aortic hemodynamics (aortic augmentation pressure and augmentation index)<br><br>No significant difference was seen between the groups for brachial BP and aortic BP                           | <sup>12</sup> Morishita M, Wang L, Speth K, Zhou N, Bard RL, Li F, Brook JR, Rajagopalan S, Brook RD. Acute blood pressure and cardiovascular effects of near-roadway exposures with and without n95 respirators. Am J Hypertens. 2019;32:1054-1065                                                                  |
| <b>Zhao 2020 (Beijing, China)</b>     | Randomized, crossover trial<br><br>Outcomes: BP, pulmonary function, fractional exhaled nitric                                                                | 29 healthy young adults    | Home Air Filter         | Sham or High-efficiency particulate air filter was placed in the center of the subject's dormitory                                                                                                          | Sham purification showed a significant increase in fractional exhaled nitric oxide and soluble P-selectin. Pollution waves lead to                                                                                                                        | <sup>13</sup> Zhao Y, Xue L, Chen Q, Kou M, Wang Z, Wu S, Huang J, Guo X. Cardiorespiratory responses to fine particles during ambient pm2.5 pollution waves: Findings from a randomized crossover trial in young healthy adults. Environ Int. 2020;139:105590                                                       |

|                                    |                                                                                                                                                                                                 |                                    |                 |                                                                                                                                                                                                                                 |                                                                                                                                                                                                                                                                                                  |                                                                                                                                                                                                                                                                                                                                 |
|------------------------------------|-------------------------------------------------------------------------------------------------------------------------------------------------------------------------------------------------|------------------------------------|-----------------|---------------------------------------------------------------------------------------------------------------------------------------------------------------------------------------------------------------------------------|--------------------------------------------------------------------------------------------------------------------------------------------------------------------------------------------------------------------------------------------------------------------------------------------------|---------------------------------------------------------------------------------------------------------------------------------------------------------------------------------------------------------------------------------------------------------------------------------------------------------------------------------|
|                                    | oxide, circulating biomarkers for platelet activation, blood coagulation and systemic oxidative stress                                                                                          |                                    |                 | during PM2.5 pollution waves for 2 weeks.                                                                                                                                                                                       | a decrease in pulmonary function. The above changes in biomarkers were attenuated and insignificant in the high-efficiency air filter group<br><br>There was no significant association between personal PM2.5 exposure and BP and no significant difference in BP between the treatment groups. |                                                                                                                                                                                                                                                                                                                                 |
| <b>Guo 2021 (Chongqing, China)</b> | Randomized, double-blind, crossover study<br><br>Outcomes: 15 systemic biomarkers of inflammation, coagulation and oxidative stress; lung function; BP, HR, and fractional exhaled nitric oxide | 24 healthy aged-care center adults | Home Air Filter | High-efficiency particulate air filter air purifiers or a placebo air purifier was used for 2 consecutive days, with a 12-day wash-out period before switching intervention groups                                              | Air filtration resulted in a significant decrease concentration of inflammatory and coagulation biomarkers, but not oxidative stress and lung function biomarkers. HR decreased significantly with air filtration. There was no significant difference between the groups for BP.                | <sup>14</sup> Guo M, Du C, Li B, Yao R, Tang Y, Jiang Y, Liu H, Su H, Zhou Y, Wang L, Yang X, Zhou M, Yu W. Reducing particulates in indoor air can improve the circulation and cardiorespiratory health of old people: A randomized, double-blind crossover trial of air filtration. <i>Sci Total Environ.</i> 2021;798:149248 |
| <b>Han 2021 (Nankai, China)</b>    | Randomized, double-blind, crossover study<br><br>Outcomes: BP, HR, and heart rate variability                                                                                                   | 39 healthy university students     | Personal Mask   | 2-hour exposure to air nearby a busy road. Participants wore either an N95 mask, a PM filter mask, a VOCs filter mask, or a sham filter mask. Participants had a washout period of at least 1 week between intervention change. | HRV measurements increased during and following exposure for all interventions. Systolic and diastolic BP increased slightly during exposure for all interventions. HR decreased during and after exposure, and was lower in all intervention vs sham.                                           | <sup>15</sup> Han B, Zhao R, Zhang N, Xu J, Zhang L, Yang W, Geng C, Wang X, Bai ZD, Vedal S. Acute cardiovascular effects of traffic-related air pollution (trap) exposure in healthy adults: A randomized, blinded, crossover intervention study. <i>Environ Pollut.</i> 2021;288:117583                                      |

|                                         |                                                                                                                                                                  |                                                  |                     |                                                                                                                                           |                                                                                                                                                                                                                                                                                                                     |                                                                                                                                                                                                                                                                                                                                                                |
|-----------------------------------------|------------------------------------------------------------------------------------------------------------------------------------------------------------------|--------------------------------------------------|---------------------|-------------------------------------------------------------------------------------------------------------------------------------------|---------------------------------------------------------------------------------------------------------------------------------------------------------------------------------------------------------------------------------------------------------------------------------------------------------------------|----------------------------------------------------------------------------------------------------------------------------------------------------------------------------------------------------------------------------------------------------------------------------------------------------------------------------------------------------------------|
| <b>Hudda 2021 (Massachusetts, USA)</b>  | Randomized, crossover study<br><br>Outcomes: Change in Systolic BP and Diastolic BP, and HR                                                                      | 77 participants, with an average age of 60 years | Home Air Filter     | 2-hour exposures to air near an interstate highway, a total of 3 times at high, medium and low traffic-related air pollution levels.      | Systolic BP increased with increased exposure duration, with a correlation between the amount of increase and magnitude of exposure. Mean change in Systolic BP was 0.6mmHG, 1.3mm HG, and 2.8mm HG for low, medium and high exposure levels respectively. No significant changes were seen in diastolic BP and HR. | <sup>16</sup> Hudda N, Eliasziw M, Hersey SO, Reisner E, Brook RD, Zamore W, Durant JL, Brugge D. Effect of reducing ambient traffic-related air pollution on blood pressure: A randomized crossover trial. <i>Hypertension</i> . 2021;77:823-832                                                                                                              |
| <b>Wang 2021 (Beijing, China)</b>       | Randomized, crossover study<br><br>Outcomes: Cardiorespiratory biomarkers                                                                                        | 54 healthy students                              | Home Air Filter     | Real or sham high-efficiency particulate air filter for 1 week, and change of group after a washout period                                | Diastolic BP, fractional exhaled nitric oxide, and 8-isoprostane levels all decreased significantly in real air filtration. FEV1, PEF and FEF <sub>25%-75%</sub> were significantly improved with real air filtration.                                                                                              | <sup>17</sup> Wang Y, Zhao Y, Xue L, Wu S, Wang B, Li G, Huang J, Guo X. Effects of air purification of indoor pm2.5 on the cardiorespiratory biomarkers in young healthy adults. <i>Indoor Air</i> . 2021;31:1125-1133                                                                                                                                        |
| <b>Eom 2022 (Cheongju, South Korea)</b> | Randomized, double-blind, crossover study<br><br>Outcomes: BP, heart rate variability, baroreflex sensitivity, autonomic function tests and endothelial function | 38 patients with coronary artery disease         | Home Air Filter     | Real or sham air filtration for 2 weeks, with a 2-week washout period                                                                     | Real filtration significantly associated with a decrease in 8-hydroxy-2'-deoxyguanosine (indicator of oxidative stress).<br><br>Blood pressure was not significantly different between the groups.                                                                                                                  | <sup>18</sup> Eom SY, Kim A, Lee JH, Kim SM, Lee SY, Hwang KK, Lim HJ, Cho MC, Kim YD, Bae JW, Kim JH, Lee DI. Positive effect of air purifier intervention on baroreflex sensitivity and biomarkers of oxidative stress in patients with coronary artery disease: A randomized crossover intervention trial. <i>Int J Environ Res Public Health</i> . 2022;19 |
| <b>Faridi 2022 (Tehran, Iran)</b>       | Randomized, crossover study<br><br>Outcomes: Brachial BP, heart rate variability, high-sensitivity cardiac troponin                                              | 28 healthy young adults                          | Personal Respirator | 48-hour intervention with particulate-filtering respirator and 6-day washout period between change in intervention. Study took place in a | No significant difference between interventions was seen for brachial BP. High frequency power and heart rate increased significantly with respirator intervention                                                                                                                                                  | <sup>19</sup> Faridi S, Brook RD, Hassanvand MS, Nodehi RN, Shamsipour M, Tajdini M, Naddafi K, Sadeghian S. Cardiovascular health effects of wearing a particulate-filtering respirator to reduce particulate matter exposure: A randomized crossover trial. <i>J Hum Hypertens</i> . 2022;36:659-669                                                         |

|  |  |  |  |                                                                                                                                        |  |  |
|--|--|--|--|----------------------------------------------------------------------------------------------------------------------------------------|--|--|
|  |  |  |  | dormitory 200m from a major 4-lane street and 2m away from a major 2-lane street with 2000 and 550 vehicle flow per hour respectively. |  |  |
|--|--|--|--|----------------------------------------------------------------------------------------------------------------------------------------|--|--|

**Abbreviations:** RHI: reactive hyperemia index; SBP: systolic blood pressure; DBP: diastolic blood pressure; FEV1: forced expiratory volume in 1 minute; MCP1: monocyte chemoattractant protein 1; MPO: myeloperoxidase; IL1beta: interleukin-1beta; COPD: chronic obstructive pulmonary disease. IL6: interleukin 6; CRP: c-reactive protein; HRV: heart rate variability; HEPA: High efficiency particulate air; PAT: peripheral artery tonometry; IA: inside air; OA: outside air; PAPR: powered air purifying respirator; CRH: Corticotropin-releasing hormone; ACTH: Adrenocorticotropic hormone; VOCs: Volatile organic compounds; peak expiratory flow; FEF<sub>25%-75%</sub>: forced expiratory flow between the 25<sup>th</sup> and 75<sup>th</sup> percentile of forced vital capacity.
